# Supplementary material
Source: publisher site journal article supplement (https://www.dovepress.com/article/216542)
Supplement: Supplementary file 1 [file get_supplementary_file.php]

**Supplementary materials**

**
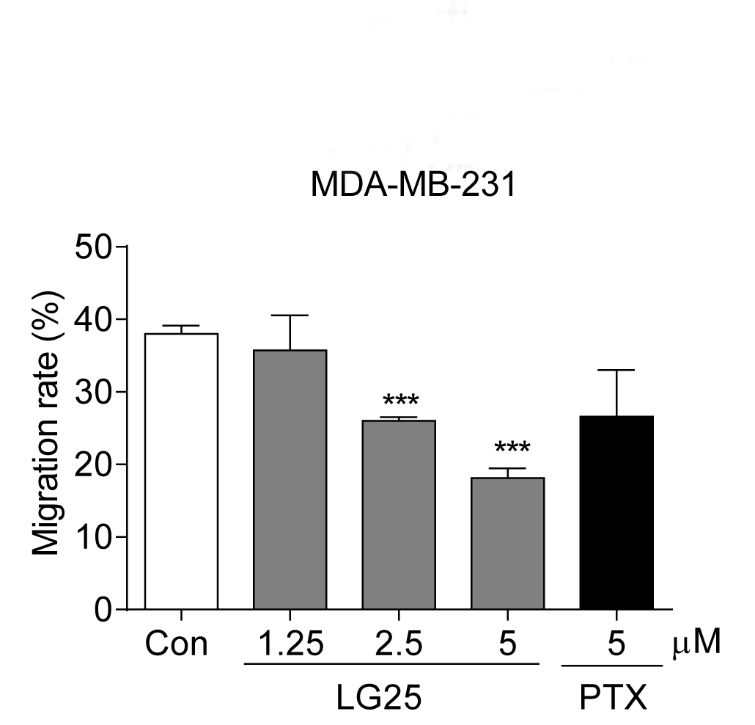
**

**Supplementary Figure 1:** Histogram showing inhibition of migratory rate of MDA-MB-231 cells by LG25. Cells were treated with LG25 at 0.63, 1.25 or 2.5 μM, paclitaxel at 5 μM, or DMSO vehicle control (con) for 24 h. Migration of cells was assessed by the degree of gap closure in the scratch/wound healing assay. Data are presented as the Mean ± SEM of three independent experiment, ****P* < 0.001 compared to con.


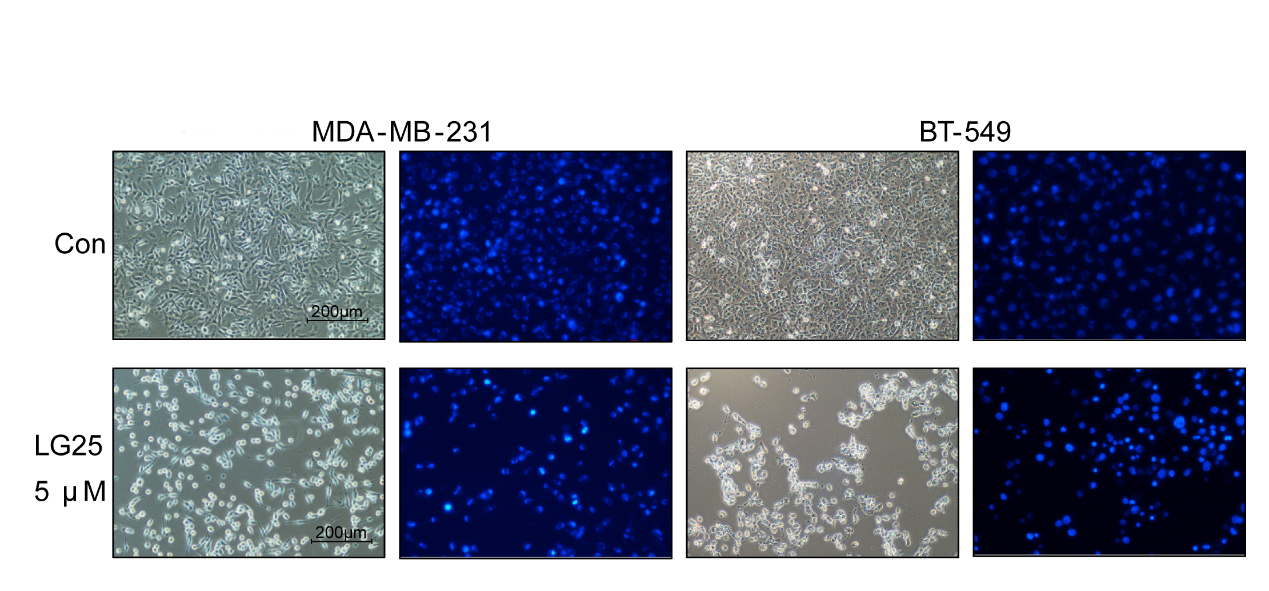


**Supplementary Figure 2:** Phase contrast images and Hoechst nuclear dye staining of TNBCs showing cytotoxicity induced by LG25. MDA-MB-231 and BT-549 cells were exposed to LG25 at 5 µM for 24 h. Phase images were then captured. Cells were also stained with Hoechst 33258 (blue). LG25 induced cell shrinkage, loss of cell membrane integrity, nuclear swelling, condensed chromatin and apoptotic bodies in both MDA-MB-231 and BT-549.


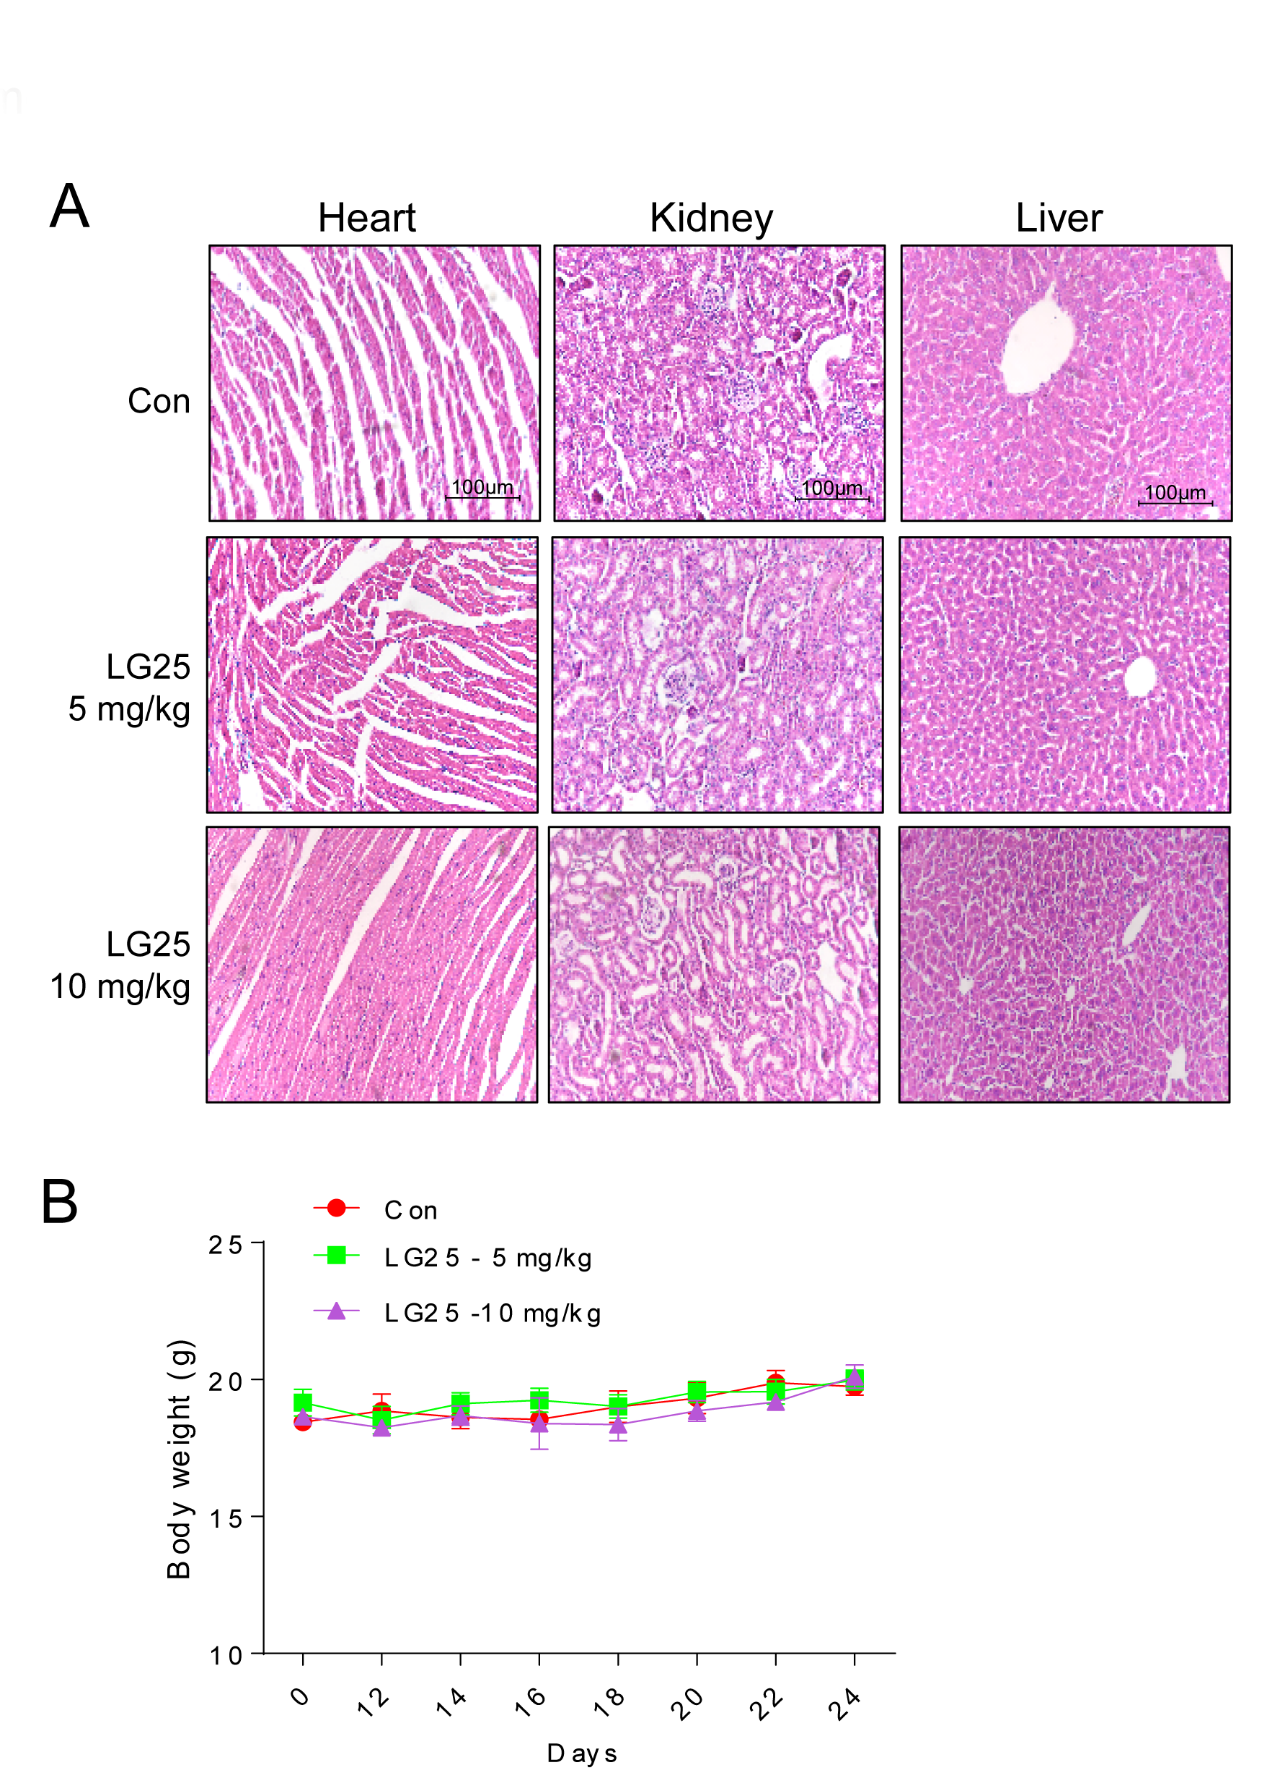


**Supplementary Figure 3:** (A) Brightfield images of H&E-stained sections of heart, kidney and liver tissues from untreated mice (con) and mice treated with LG25 at 5 and 10 mg/kg. (B) Measurement of mouse body weights at indicated time points. No differences were observed between mice treated with LG25 and untreated mice. Data presented as the Mean ± SEM of three independent experiments, n=5.
